# Supplementary material for: CD44 Can Compensate for IgSF11 Deficiency by Associating with the Scaffold Protein PSD-95 during Osteoclast Differentiation
Source: PubMed Central journal article supplement (PMC7177690; doi:10.3390/ijms21072646), 2020-04-10
Supplement: ijms-21-02646-s001.pdf [file ijms-21-02646-s001.pdf]

Supplementary

**A**

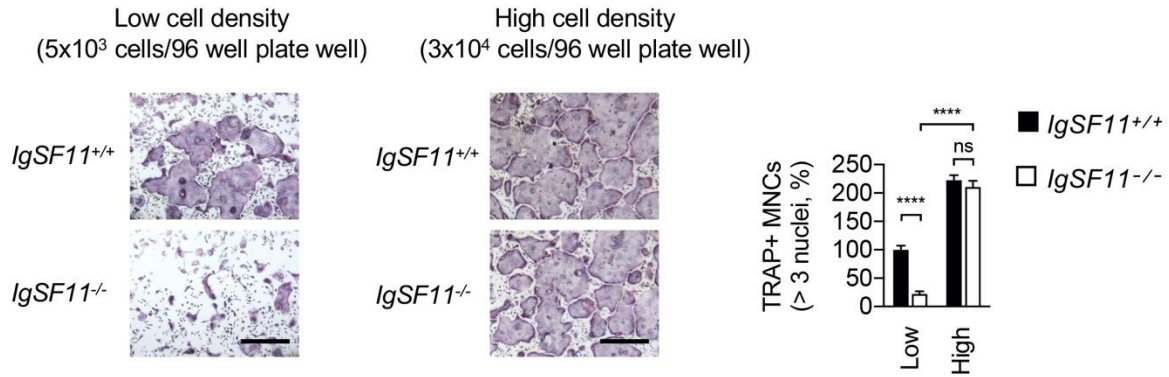

**B**

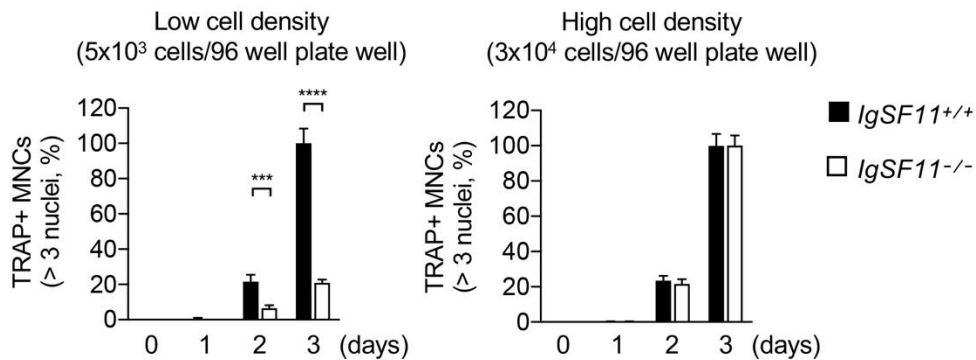

**Figure S1.** Increased cell density rescues impaired in vitro IgSF11-deficient osteoclast differentiation. **(A)** IgSF11<sup>+/+</sup> and IgSF11<sup>-/-</sup> BMMs were cultured at low cell density ( $5 \times 10^3$  cells/96 well plate well) or high cell density ( $3 \times 10^4$  cells/96 well plate well) with M-CSF + RANKL for three days to induce osteoclast differentiation. On day 3, cells were fixed and stained with TRAP (left). TRAP<sup>+</sup> multinucleated cells (3 nuclei or more per cell) were counted and the frequency of TRAP<sup>+</sup> multinucleated cells is shown (right). Scale bars represent 100  $\mu$ m. **(B)** IgSF11<sup>+/+</sup> and IgSF11<sup>-/-</sup> BMMs were cultured at low cell density ( $5 \times 10^3$  cells/96 well plate well) or high cell density ( $3 \times 10^4$  cells/96 well plate well) with M-CSF + RANKL for three days to induce osteoclast differentiation. Cells were fixed day by day (from Day 0 to Day 3), and stained with TRAP. TRAP<sup>+</sup> multinucleated cells (3 nuclei or more per cell) were counted and the frequency of TRAP<sup>+</sup> multinucleated cells is shown. Data are shown as the mean  $\pm$  S.D. \*\*\* $p < 0.001$ , \*\*\*\* $p < 0.0001$ , ns; not significant.

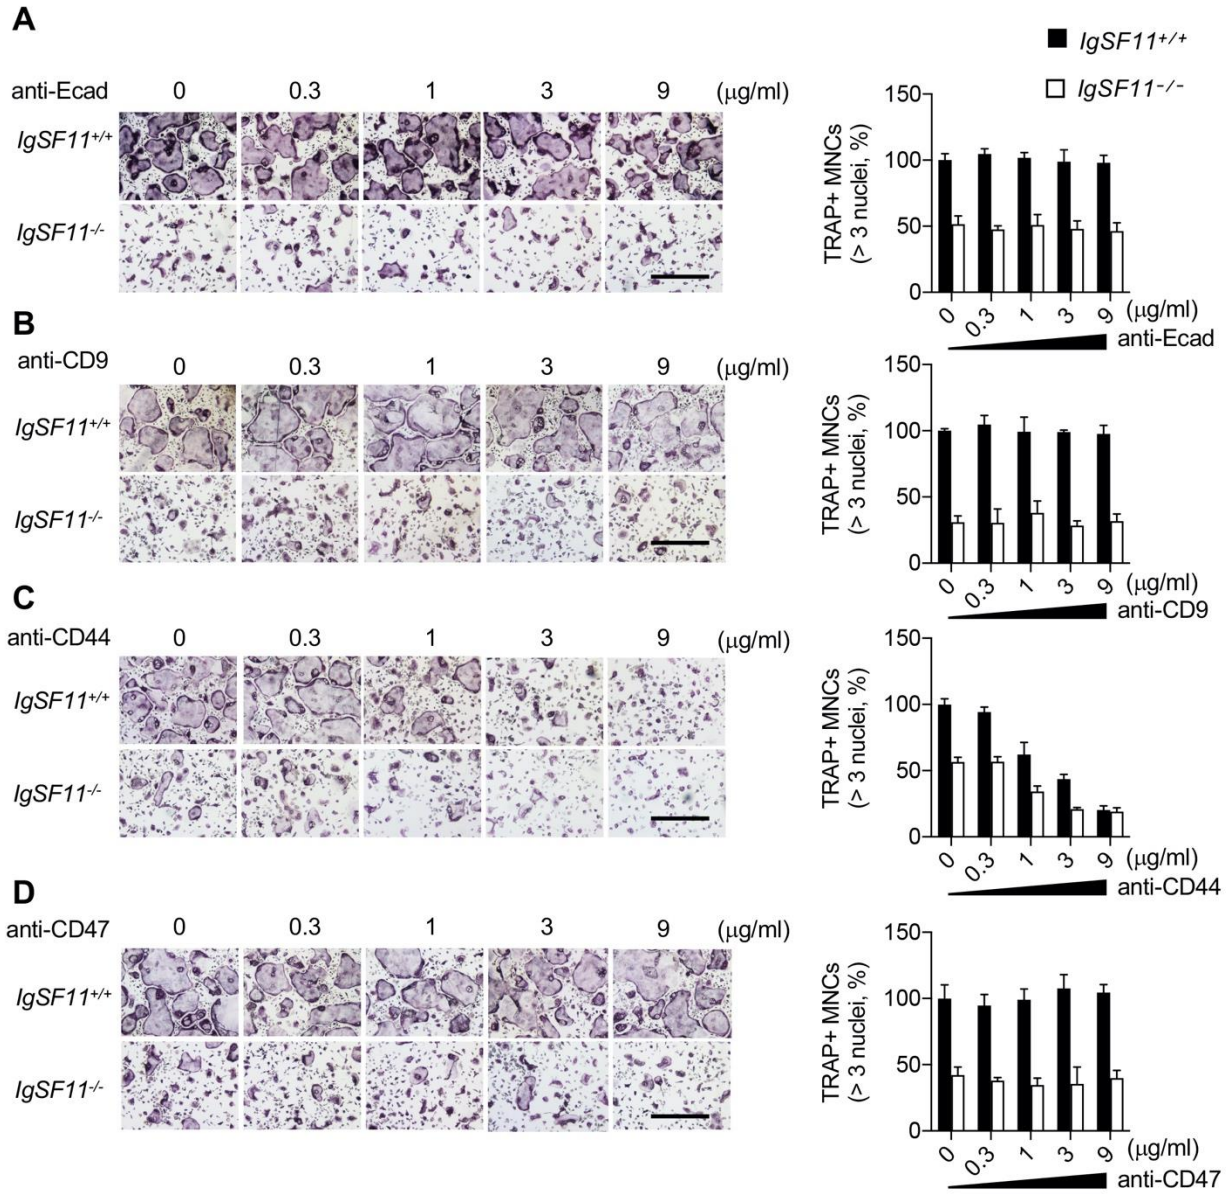

**Figure S2.** Effect of blocking antibodies against osteoclast differentiation/multinucleation-related molecules. Low cell density cultures of *IgSF11<sup>+/+</sup>* and *IgSF11<sup>-/-</sup>* BMMs were treated with the indicated doses of soluble antibodies (**A**) anti-E-cadherin, (**B**) anti-CD9, (**C**) anti-CD44, and (**D**) anti-CD47, and cultured with M-CSF + RANKL for three days to induce osteoclast differentiation. On day 3, cells were fixed and stained with TRAP (left). TRAP<sup>+</sup> multinucleated cells (3 nuclei or more per cell) were counted and the frequency of TRAP<sup>+</sup> multinucleated cells is shown (right). Scale bars represent 100  $\mu\text{m}$ . Data are shown as the mean  $\pm$  S.D.

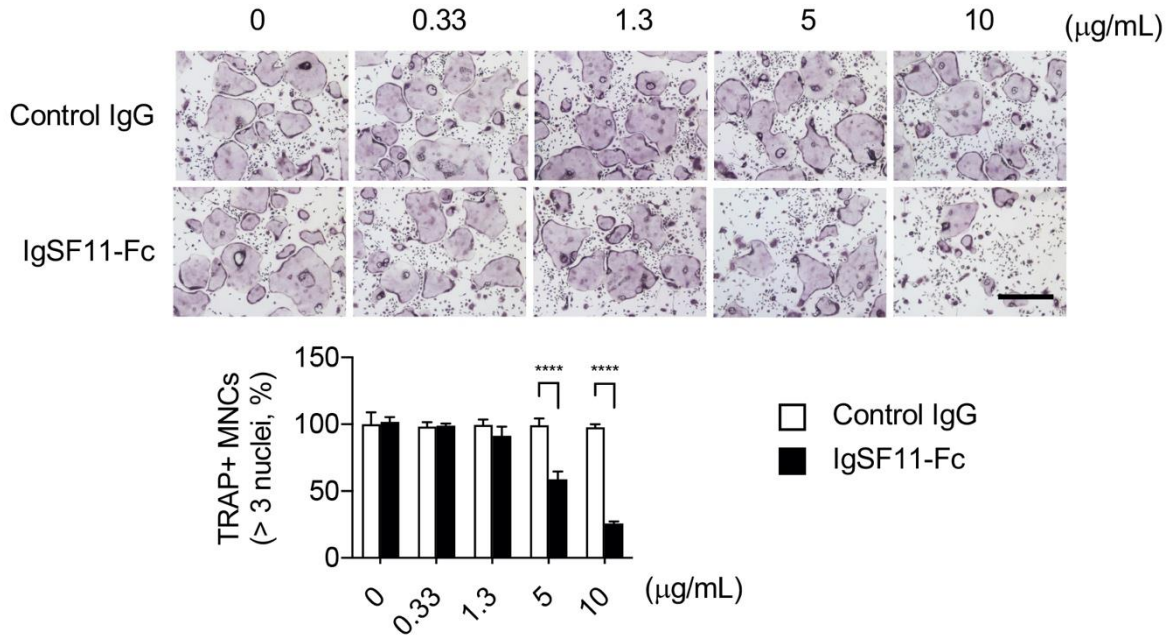

**Figure S3.** Effect of soluble IgSF11-Fc on osteoclast differentiation. Low cell density cultures of wild-type BMMs were treated with the indicated doses of soluble IgSF11-Fc or Control IgG, and cultured with M-CSF + RANKL for three days. On day 3, cells were fixed and stained with TRAP (upper). TRAP<sup>+</sup> multinucleated cells (3 nuclei or more per cell) were counted and the frequency of TRAP<sup>+</sup> multinucleated cells is shown (bottom). Scale bars represent 100 µm. Data are shown as the mean ± S.D. \*\*\*\**p* < 0.0001.
